# Supplementary material
Source: PubMed Central journal article supplement (PMC6484816)
Supplement: jamasurg-154-295-s001.pdf [file jamasurg-154-295-s001.pdf]

1

2

3

### **Title**

4

Application of 3D printing technique in small pulmonary nodule  
5 localization: A Prospective, Randomized, Controlled, Non-  
6 inferiority Trial

7

### **Grant**

8

Nature Science Foundation of China (81570014) and Shanghai  
9 Hospital Develop Center(16CR3018A)

9

10

### **Principal Investigator**

11

Chang chen

12

### **Sponsor**

13

Shanghai Pulmonary Hospital, Tongji university, Shanghai, China

14

15

**Version Number: 1.0**

16

**01-10-2016**

17

18

## **STATEMENT OF COMPLIANCE**

19

20

21

22

23

24

25

26

The study will be conducted in accordance with Declaration of Helsinki, International Conference on Harmonization guidelines for Good Clinical Practice (ICH E6) and Medical Equipment Specification for the Quality Control of Clinical Trial (State Food and Drug Administration/National Health and Family Planning Commission/Number twenty-fifth). All personnel involved in the conduct of this study have completed human subject protection training.

27

**SIGNATURE PAGE**

28 The signature below constitutes the approval of this protocol and provides  
29 the necessary assurances that this trial will be conducted according to all  
30 stipulations of the protocol, including all statements regarding  
31 confidentiality, and according to local legal and regulatory requirements.

32 **Principal Investigator:**

Signed:

Date:

\_\_\_\_\_

Name: Chang Chen

Title: MD., Ph.D.

33

34

35

## **Table of Contents**

|    |                                              |    |
|----|----------------------------------------------|----|
| 36 | STATEMENT OF COMPLIANCE.....                 | 2  |
| 37 | SIGNATURE PAGE.....                          | 3  |
| 38 | TABLE OF CONTENTS.....                       | 4  |
| 39 | PROTOCOL SUMMARY.....                        | 5  |
| 40 | LIST OF ABBREVIATIONS.....                   | 6  |
| 41 | INTRUCTION.....                              | 8  |
| 42 | OBJECTIVES.....                              | 11 |
| 43 | STUDY DESIGN.....                            | 13 |
| 44 | STUDY ENROLLMENT AND WITHDRAW.....           | 16 |
| 45 | STUDY INTERVENTION.....                      | 19 |
| 46 | OUTCOME EVALUATION.....                      | 20 |
| 47 | ETHICS AND PROTECTION OF HUMAN SUBJECTS..... | 23 |
| 48 | DATA STORAGE POLICY.....                     | 26 |
| 49 |                                              |    |
| 50 |                                              |    |

51

## PROTOCOL SUMMARY

52 **Title:** Application of 3D printing technique in small pulmonary nodule  
53 localization: A Prospective, Randomized, Controlled, Non-inferiority  
54 Trial.

55 **Objective:** To evaluate the accuracy and safety of template-guided lung  
56 nodule localization compared to standard computed tomography (CT)-  
57 guided localization.

58 **Participants:** Surgical candidates with solitary pulmonary nodule <2 cm  
59 will be approached prior to scheduled lung resection. The necessity of  
60 preoperative nodule localization would also be evaluated by the patient's  
61 operating surgeon in charge. After acquiring patients' consent to  
62 participate into the study, enrolled patients will be randomized into the  
63 CT- or template-guided group using a previously generated random table.  
64 According to priori study, each group would have a sample size of 100  
65 participants.

66 **Number of site:** This is a single-center trial and all participants would be  
67 recruited in Shanghai Pulmonary Hospital.

68 **Description of Intervention:** The three-dimensional printed,  
69 navigational template was created to guide percutaneous lung nodule  
70 localization. Its utility has been tested in previous feasibility trial.

71 **Estimated Study Duration:** From 01-10-2016 to 01-07-2019.

72 **Estimated Time to Complete Enrollment:** From 01-10-2016 to 01-06-  
73 2019.

74

75

76

### Schematic of Study Design

77

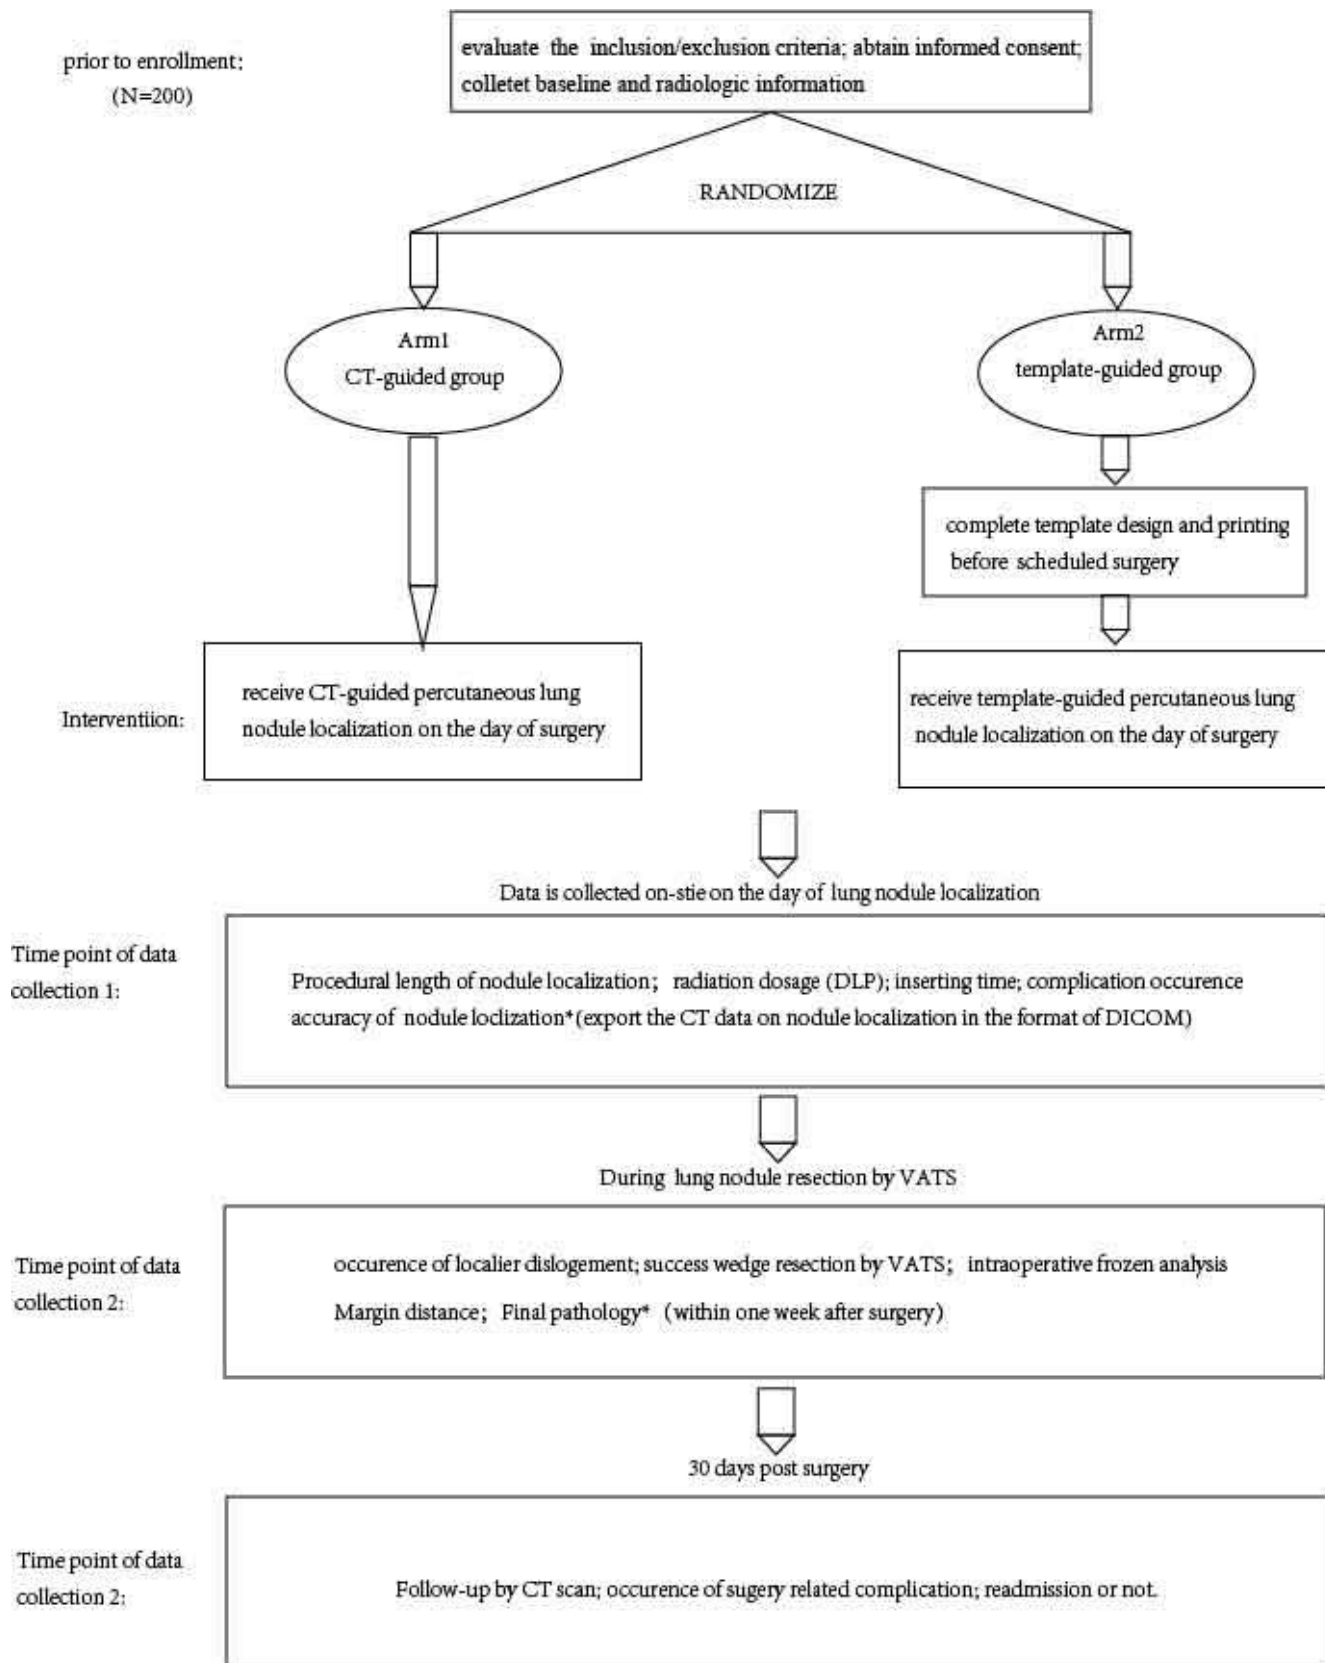

79

80

## **LIST OF ABBREVIATIONS**

81

82 3D

three-dimensional

83 CT

computed tomography

84 GGO

ground glass nodule

85 VATS

video assisted thoracoscopic surgery

86 DLP

dose-length product

87 ED

effective dosage

88 **1 INTRODUCTION: BACKGROUND INFORMATION AND**  
89 **SCIENTIFIC RATIONALE**

90 **1.1 Background information**

91 With the widespread utilization of high resolution low-dosage CT  
92 scan in lung cancer screening, small lung nodules less than 1 cm in  
93 diameter are detected more often than ever. Biopsy resection by video-  
94 assisted thoroscopic surgery(VATS) is an ideal option to diagnose and,  
95 at the same time, offer a curative intervention. In the dairy practice of  
96 thoracic surgery, small lung nodule resection by VATS has accounts for a  
97 large proportion.

98 Small-sized nodules, however, especially ground-glass opacity  
99 (GGO)-dominant nodules located deep in the lung parenchyma, are  
100 difficult to recognize during VATS. It was reported that failure of nodule  
101 localization is the most common reason leading to conversion to  
102 thoracotomy. In order to deal with this problem, there have developed  
103 many modalities to preoperatively localize the target lung nodule to  
104 facilitate nodule resection by VATS. Among those, percutaneous  
105 transthoracic lung nodule localization is the most frequently used  
106 approach because of its simplicity and independence of special equipment.  
107 Usually, the patients is taken into the CT room to receive lung nodule  
108 localization under CT guidance before the scheduled surgery. Despite its  
109 assistance in successful nodule resection by VATS, CT-guided  
110 percutaneous localization is sometimes arduous and requires many times  
111 of localizer redirection. Especially when the interventional radiologist is  
112 less experienced, it often takes many times of CT scans to accurately  
113 localize the target nodule.

114 With the purpose of facilitating nodule localization procedure and



115 reduce radiation exposure, a navigational template was created using  
116 three-dimensional (3D) printing technology and its utilization in clinical  
117 application has been preliminarily tested in previous study.

## 118 **1.2 Rationale**

119 The navigational template is created based on patient's CT images.  
120 Firstly, the CT data is downloaded from Picture Archiving and  
121 Communication Systems (PACS), then imported into the computer-aided  
122 design (CAD) software to reconstruct patient's thoracic digital model.  
123 According to this digital model, the navigational template was designed  
124 to mark the puncture site and angle of the localizer prior to nodule  
125 localization. In order to achieve accurate template placement on patient's  
126 thorax, several anatomical landmarks were marked on the template to  
127 check for template alignment.

128 With the assistance of navigational template, the practitioner does  
129 not need to manually calculate the inserting site and angle according to  
130 the two-dimensional image, but insert the localizer according to the  
131 guidance of template.

## 132 **1.3 Potential Risks and Benefits**

### 133 **1.3.1 Potential Risks**

134 The mechanism of template-guided lung nodule localization is the  
135 same as conventional CT-guided localization. Therefore, complications  
136 related to percutaneous lung nodule localization such as pain, pulmonary  
137 hemorrhage, pneumothorax, hemoptysis and so on, likely occur. Most of

138 these complication is non-significant and do not need special  
139 intervention.

140 For patient assigned to receive templated-guided nodule  
141 localization, the most worrying concern is the accuracy of lung nodule  
142 localization. Firstly, the previous feasibility trial has confirmed the  
143 precision of the navigational template, with 10.0 mm of the median  
144 localizer deviation and no occurrence of severe complications in  
145 template-guided localization. Secondly, for the sake of safety of  
146 participants in this trial , patients would receive CT scan to confirm the  
147 accuracy of the template-guided lung nodule localization after template  
148 placement but before localizer insertion.

149 Regarding to the concern of infection, the entire template was  
150 sterilized by UV irradiation for 30 minutes and the area adjacent to  
151 puncture point was sterilized using iodine. And the metal introducer  
152 sheath, through which the localizer was introduced, was sterilized using  
153 autoclave sterilizer. And infection of the puncture site was not found  
154 in our previous study. Additionally, as the template is made of nylon  
155 (PA3200), patients with a history of nylon allergy should not receive  
156 template-guided localization.

### 157 **1.3.2 Potential Benefits**

158           Based on our priori study, the application of 3D-printed template in  
159 lung nodule localization might facilitate the process of lung nodule  
160 localization. In template-guided lung nodule localization, radiologist do  
161 not need to measure the puncture site/angle/length from the two-  
162 dimensional CT images. Instead, the template pre-specified the insertion  
163 site and angle of the localizer. In this way, the practitioner may not need  
164 to take repeated attempts to redirecting the localizer, which leads to  
165 increased radiation exposure and high complication rate.

166           Therefore, patients receiving template-guided lung nodule  
167 localization would suffer less radiation exposure and lower complication  
168 rate. For the viewpoint of radiologist, the application of template  
169 significantly alleviates the challenge on practitioner and simplify the  
170 procedure of lung nodule localization. Lastly, the conventional CT-  
171 guided localization method requires the patients to stay still in one  
172 position during the whole procedure. It might be difficult for some  
173 patients, especially with obvious cough symptoms. However, in  
174 template-guided localization, the requirement about patient's position was  
175 not so strict. Patients might be more easily to cooperate in the template-  
176 guided lung nodule localization.

## 177 **2 OBJECTIVES**

### 178 **2.1 Study Objectives**

179           To evaluate the safety and accuracy of navigational template-  
180 guided method in percutaneous lung nodule localization.

### 181 **2.2 Study Outcome**

#### 182 **2.2.1 Primary outcome**

183 The primary outcome of this study is the precision of the lung nodule  
184 localization, which was specified by the localizer deviation. As the center  
185 of the nodule is the designed target, localizer deviation is measured  
186 between the center of nodule and the localizer. Regarding to  
187 measurement of the localizer deviation, because the localizer and the  
188 target nodule might be not on the same section of the CT scan, it is  
189 impossible to accurately measure the deviation from two-dimensional  
190 images.

191 Therefor we reconstruct the CT images upon nodule localization into  
192 three-dimensional virtual model, and precisely measure the localizer  
193 deviation in three dimensions.

#### 194 **2.2.2 Secondary outcome**

195 The secondary outcome includes procedural length, radiation  
196 exposure dosage and related complication rate.

197 In order to facilitate the process of data collection, the procedural  
198 length of nodule localization was inferred from CT scanning parameter.  
199 The time length of nodule localization is calculated from patients  
200 receiving the initial CT scan to patients receiving the last CT scan for  
201 complication evaluation. And, the radiation exposure dosage (dose-  
202 length-product) is directly collected from monitor screen after the last CT  
203 scanning. The complication related to percutaneous lung nodule  
204 localization mainly includes pneumothorax, pulmonary hemorrhage and  
205 hemoptysis during the time of waiting for surgery. The occurrence of  
206 pneumothorax and pulmonary hemorrhage is evaluated by CT scanning  
207 immediately after localizer release.

208            Additionally, localizer dislodgement rate and the margin distance  
209 reported on frozen analysis are also compared between patients  
210 undergoing CT-guided nodule localization and patients receiving  
211 template-guided nodule localization.

## 212 **3 STUDY DESIGN**

213 The study is designed to be a prospective, randomized, non-  
214 inferiority clinical trial comparing template-guided to CT-guided  
215 peripheral small lung nodule localization. The feasibility of template-  
216 guided lung nodule localization has already been confirmed in our  
217 previous study. The study is a phase II clinical trial and further examines  
218 the safety and efficacy of template-guided lung nodule localization.

### 219 **3.1 Study population and groups**

220

221 The randomized, controlled trial was approved by the institutional  
222 review board of Shanghai Pulmonary Hospital. Surgical candidates with  
223 solitary pulmonary nodule less than 2cm were prospectively recruited  
224 prior to scheduled lung resection. The necessity of preoperative nodule  
225 localization was also evaluated by patient's operating surgeon in charge.  
226 After acquiring patients' consent to participate into the study, patients  
227 were randomized into CT-guided group and template-guided group  
228 respectively.

### 229 **3.2 Sample Size Calculation**

230

231 The study was designed to confirm the non-inferiority of template-  
232 guided lung nodule localization compared to CT-guided lung nodule  
233 localization in terms of localization accuracy. And the accuracy of lung  
234 nodule localization was quantified by the localizer deviation between the

235 localization and the center of the target nodule.

236         The expected difference of localizer deviation between CT- and  
237 template-guided group was 3.5mm according to priori study. Deviation of  
238 5mm is set as non-interiority margin. We needed to randomize 140  
239 patients (70 each group) to give 90% power with one-sided alpha of 0.05.  
240 To allow for some dropouts, inclusion of 100 patients per group is  
241 planned.

242 **3.3 Interim Analysis**

243 An interim-analysis is performed on the primary and secondary  
244 outcomes when 40% of patients have been randomized. The interim-  
245 analysis is performed by an independent statistician, blinded for the  
246 treatment allocation. The data monitoring committee will have unblinded  
247 access to all data and will discuss the results of the interim-analysis in a  
248 joint meeting, and report to the ethics committee. Based on the results of  
249 interim-analysis, principal investigator decides whether the trial continues  
250 or not. The trial will be ended if the localizer deviation is significantly  
251 larger in template-guided lung nodule localization than CT-guided  
252 localization, and no benefit is obtained for patients undergoing template-  
253 guided lung nodule localization. Otherwise, the trial will be continued.

254 **3.4 Time Schedule**

255 The trail is planned to start in October 2016 and complete before  
256 July 2019, with about 10 patients enrolled per month. Patients will be  
257 followed up for one month after surgery to monitor postoperative  
258 complication.

259 **3.5 Statistical Analysis**

260 To decide whether the localization accuracy, radiation exposure  
261 and complication rate in the two groups are significantly different, three  
262 tests are used: 1) independent samples  $t$  tests for continuous variables that  
263 were normally distributed; 2)  $X^2$  tests for categorical variables, and 3.)



264 Mann-Whitney U test for continuous variables that were not normally  
265 distributed.

266           Because of the possibility of patients withdraw, intention-to-  
267 treatment (ITT) analysis and efficacy analysis are both performed. ITT  
268 analysis is conducted for participants who received lung nodule  
269 localization and subsequent surgery. Efficacy analysis is only performed  
270 for patients who received lung nodule localization according to their  
271 assignment. All statistical analyses are two-tailed with a significance  
272 level of 0.05.

273

274 **4 STYDT EBROLLMENT AND WITHDRAW**

275 **4.1 Inclusion Criteria**

276 Patient scheduled lung nodule resection by VATS is assessed for  
277 eligibility. The inclusion criteria are as follows.

278 (1) The long-axis diameter of the target lung nodule is less than or equal  
279 to 20 mm;

280 (2) The inner edge of the target nodule is at least 2 cm away from major  
281 pulmonary arteries or veins to allow secure nodule excision;

282 (3) patient's surgeon in charge must confirm the necessity of preoperative  
283 lung nodule localization.

284 (4) Male or female  $\geq 18$  years of age

285 **4.2 Exclusion criteria**

286 (1) There are more than two lung nodules which are needed to be  
287 localized for simultaneous resection.

288 (2) The target nodule is located in the scapula region; and percutaneous  
289 localizer is impeded by the scapula bone. Therefore, transthoracic  
290 percutaneous lung nodule localization is not suitable for this subset  
291 of patients.

292

### 293 **4.3 Treatment Assignment Procedures**

294 In order to randomly assign the participants to the two groups, a  
295 randomization list with 200 numbers was created using blocked  
296 randomization with a block size of 10. The 200 random numbers are each  
297 placed in sealed envelopes which are marked with sequential number at  
298 the cover.

299 Patients with scheduled lung resection are evaluated by research  
300 assistants. If the above criteria are met and patient's consent to  
301 participation has also been acquired, then the patient's information is sent  
302 to a person who is not involved with the trial by calling. Then, the  
303 accorded envelop is opened to assign the patient to template- or CT-  
304 guided localization group.

305 Because of the intrinsic property of the trial, no masking procedure  
306 is performed. After assignment, if the patient is allocated to template-  
307 guided lung nodule localization, research assistant needs to download the  
308 patients CT data from Picture Archiving and Communication Systems.  
309 The planned localization route is marked on CT images by patient's  
310 surgeon, then the CT data is emailed to designers for template design and  
311 printing. Because it takes about 6-8 hours for template production, all  
312 enrolled patents have to give consent to participate at least one day before  
313 the scheduled surgery.

314

#### 315 **4.6 Reasons for Withdrawal after Randomization**

316       When patients are firstly approached by research assistants, they  
317 are informed that they have the right to withdraw their consent to  
318 participate at any stage of the trial without influence on their medical  
319 care. Therefore, patients with intended withdrawal after randomization is  
320 excluded from the study.

321       As the decision of lung nodule localization need to be made at  
322 more than one day before the scheduled surgery to allow for template  
323 production, there is the possibility of premature randomization, which is  
324 that the assigned patient might not suitable for lung resection after  
325 preoperative assessment. Patient whose scheduled lung resection is  
326 cancelled is withdrawn from the analysis.

## 327 **5 STUDY INTERVENTION**

328 All lung nodule localization procedures in both groups are  
329 performed under the surveillance of a Brilliance 40 CT scanner (Philips  
330 Medical Systems, Netherlands) by the same practitioner. And, the  
331 percutaneous transthoracic pulmonary nodule localization is conducted  
332 using the hookwire localization system (20 gauge, PAJUNK, Germany).

### 333 **5.1 Control Group**

334 Patients in the CT-guided group received conventional CT-guided  
335 percutaneous lung nodule localization using a hookwire system. After  
336 patients were positioned on the examining table of the CT scanner  
337 (patient's position was decided based on the location of the target nodule),  
338 the initial CT scan was conducted through the area of interest using a  
339 slice thickness of 3 mm. The localizer insertion site was determined by  
340 the CT gantry laser lights and a metal marker on the skin. The insertion  
341 length and angle were measured on CT images, and the localizer was then  
342 inserted without penetrating the pleura. Afterwards, repeated CT scans  
343 were taken to confirm or redirect the localizer in order to obtain adequate  
344 accuracy of nodule localization. Based on previous experience, deviations  
345 of  $\leq 2$  cm between the localizer and the center of the target nodule were  
346 considered accurate enough to allow for safe nodule localization. After  
347 confirmation of accurate localizer placement, the practitioner inserted the

348 localizer into the lung parenchyma and removed the cannula of hookwire.

## 349 **5.2 Experiment Group**

350 Patients in the template-guided group underwent template-guided  
351 percutaneous lung nodule localization using a hookwire. After template  
352 placement and prior to hookwire insertion, an initial CT scan is obtained  
353 to pre-evaluate the accuracy of nodule localization. If the deviation is less  
354 than 2 cm on the initial CT scan, the hookwire is inserted, and the  
355 localizer is deployed. However, if the deviation  $>2$  cm based on the pre-  
356 evaluation on the initial CT scan, patients would receive conventional  
357 CT-guided localization.

358 After successful nodule localization, the CT scan is immediately  
359 obtained in order to evaluate the incidence and severity of the  
360 pneumothorax and hemorrhage in both groups. Afterwards, patients are  
361 wheeled back to the unit where they wait for the scheduled surgery.  
362 During the waiting period, patients are closely observed by nurses, and  
363 any occurrence of dyspnea and hemoptysis are detailly recorded.

## 364 **6. Outcome Evaluation**

365 The characteristics of nodule localization, including accuracy of  
366 nodule localization, procedural length, radiation exposure, and related  
367 complications are recorded on site by research assistant. Incidence of

368 localizer dislodgement and margin distance reported by frozen section  
369 analysis are collected during lung resection at the operative room.

## 370 **6.1 Measurement of Localization Accuracy**

371 The accuracy of nodule localization was defined by the deviation  
372 between the localizer and the center of the target nodule on CT images.  
373 Because the target nodule and localizer are in the three-dimensional space  
374 of a patient's thoracic cage, which may not be seen on the same cut of CT  
375 scan, it is difficult to precisely measure the deviation directly on the 2D  
376 images of CT scan. In order to accurately measure the deviation,  
377 computer-aided design (CAD) software is introduced to precisely  
378 measure the deviation.

379 Firstly, patient's thorax is reconstructed based on CT images upon  
380 nodule localization. Then the deviation is mathematically calculated  
381 using the CAD software.

## 382 **6.2 Procedural Length**

383 As the start/end point of lung nodule localization can be arbitrary and  
384 discrepancy between different researchers, procedural duration was  
385 derived from CT scan parameters, which is calculated as the time length  
386 between the initial and final scans.

387

### 388 **6.3 Radiation exposure**

389           The total amount of radiation exposure that patient receives during  
390 the lung nodule localization is quantified using dose-length product  
391 (DLP). And, the DLP value is directly displayed on the screen of the CT  
392 scanner after the scanning session. In order to estimate the relative  
393 amount of radiation dose, the effective dose (ED) is also calculated based  
394 on the DLP values (*Radiology;2008;248:995-1003*).

### 395 **6.4 Complication Related to Nodule Localization**

#### 396 **6.4.1 During lung nodule localization**

397           All lung nodule localizations are conducted with presence of at  
398 least two researcher assistants to ensure the obedience of procedure  
399 protocol and collect complication information onsite. The occurrence of  
400 pneumothorax and pulmonary hemorrhage is immediately evaluated on  
401 the CT scan after the deployment of localizer. Other infrequent  
402 complications such as vasovagal response and hemoptysis are also  
403 recorded.

#### 404 **6.4.2 After localization prior to surgery**

405           After lung nodule localization, patients are taken into the unit to  
406 wait for surgery. In this period of time, patients are monitored closely by  
407 nurses in case of the exacerbation of pneumothorax. And, occurrence of



408 hemoptysis and any other discomforts are detailed recorded.

### 409 **6.4.3 During Surgery**

410 Whether the target nodule is successfully resected by VATS with  
411 wedge resection is recorded by on-site researchers. During the VATS, the  
412 occurrence of localizer dislodgement is also recorded. After lung wedge  
413 resection, the margin distance reported by frozen section analysis is  
414 collected.

415

## 416 **7. ETHICS AND PROTECTION OF HUMAN SUBJECTS**

### 417 **7.1 Ethical Standard**

418 The investigator will ensure that this study is conducted in full  
419 conformity with the rules set by the Medical Equipment Specification for  
420 the Quality Control of Clinical Trial (*State Food and Drug*  
421 *Administration/National Health and Family Planning*  
422 *Commission/Number twenty-fifth*). All personnel involved in the conduct  
423 of this study have completed human subject protection training.

### 424 **7.2 Institutional Review Board**

425 The protocol, informed consent form(s), recruitment materials, and  
426 all subject materials will be submitted to the IRB (*Shanghai pulmonary*

427 *hospital affiliated to Tongji University)* for review and approval.  
428 Approval of both the protocol and the consent form must be obtained  
429 before any subject is enrolled. Any amendment to the protocol will  
430 require review and approval by the IRB before the changes are  
431 implemented in the study.

### 432 **7.3 Informed Consent Process**

433 Before the participants agree to participate into the trial, Informed  
434 consent is obtained in the study and continues throughout study  
435 participation. Extensive discussion of risks and possible benefits of study  
436 participation will be provided to subjects. A consent form describing in  
437 detail the study procedures and related risks would be given to the subject  
438 before participation. Consent forms will be IRB-approved, and the  
439 subject is required to read and review the document or have the document  
440 read to him or her. The investigator or designee will explain the research  
441 study in detail to the participants and answer any questions that may  
442 arise. Subjects will sign the informed consent document before any study-  
443 related assessments or procedures. Subjects will be given the opportunity  
444 to discuss the study with their surrogates or think about it prior to  
445 agreeing to participate. They may withdraw consent at any time  
446 throughout the course of the study. A copy of the signed informed  
447 consent document will be given to subjects for their records. The rights

448 and welfare of the subjects will be protected by emphasizing to them that  
449 the quality of their clinical care will not be adversely compromised if they  
450 refuse to participate in this trial. The consent process will be documented  
451 in the clinical or research record.

## 452 **8. DATA STORAGE POLICY**

453 The principal investigator is responsible for ensuring the accuracy,  
454 completeness, legibility, and timeliness of the data reported. All source  
455 documents should be completed in a neat, legible manner to ensure  
456 accurate interpretation of data. The investigators need to maintain  
457 adequate case histories of study subjects, including accurate case report  
458 forms (CRFs) and source documentation.

459 Data collection and accurate documentation are the responsibilities  
460 of the study staff under the supervision of the primary investigator. All  
461 source documents, laboratory results and CT images must be reviewed by  
462 the study team and data entry staff, who will ensure that they are accurate  
463 and complete. Unanticipated problems and adverse events must be  
464 reviewed by the primary investigator.

465 All the study documents and records should be stored for a  
466 minimum of 2 years after trial completion, which is required by the  
467 Medical Equipment Specification for the Quality Control of Clinical Trial

468 *(State Food and Drug Administration/National Health and Family*  
469 *Planning Commission/Number twenty-fifth)*. No trial documents should  
470 be deliberately destroyed or damaged without consent of the IRB.
