# Supplementary material
Source: PubMed Central journal article supplement (PMC6484816)
Supplement: jamasurg-154-295-s002.pdf [file jamasurg-154-295-s002.pdf]

## Supplementary Online Content

Zhang L, Wang L, Kadeer X, et al; AME Thoracic Surgery Collaborative Group. Accuracy of a 3-dimensionally printed navigational template for localizing small pulmonary nodules: a noninferiority randomized clinical trial. *JAMA Surg*. Published online December 26, 2018. doi:10.1001/jamasurg.2018.4872

**eFigure 1.** Design and Printing of the Navigational Template

**eFigure 2.** Representative Images of Localizer Deviation

**eFigure 3.** Measurement of Localizer Deviation in 3-D by Tomographic Reconstruction

**eFigure 4.** Subgroup Analysis of Localizer Deviation by Patients' Positions and Nodules' Locations in Template-Guided Lung Nodule Localization

**eTable.** Comparison of Frozen Section Analysis and Final Pathology

This supplementary material has been provided by the authors to give readers additional information about their work.

**eFigure 1. Design and Printing of the Navigational Template. A, target nodule shown on the CT scan; B, pre-specified inserting route of the localizer; C, virtual model of the template; D, 3D-printed navigational template. Red arrows indicate the target nodule.**

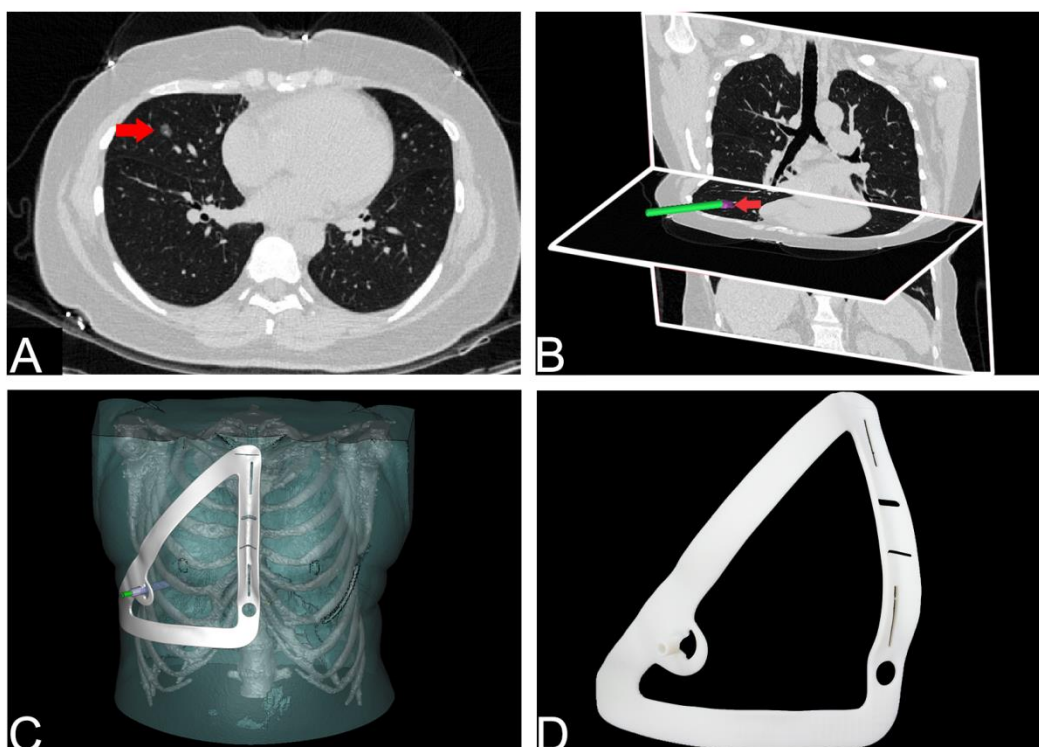

**eFigure 2. Representative Images of Localizer Deviation. A, localizer (pointed by the red arrow); B, target nodule (pointed by the red arrow); C, reconstruction of CT scan after nodule localization. For demonstration purpose, nodule localization with relatively a large deviation of 15 mm was chosen.**

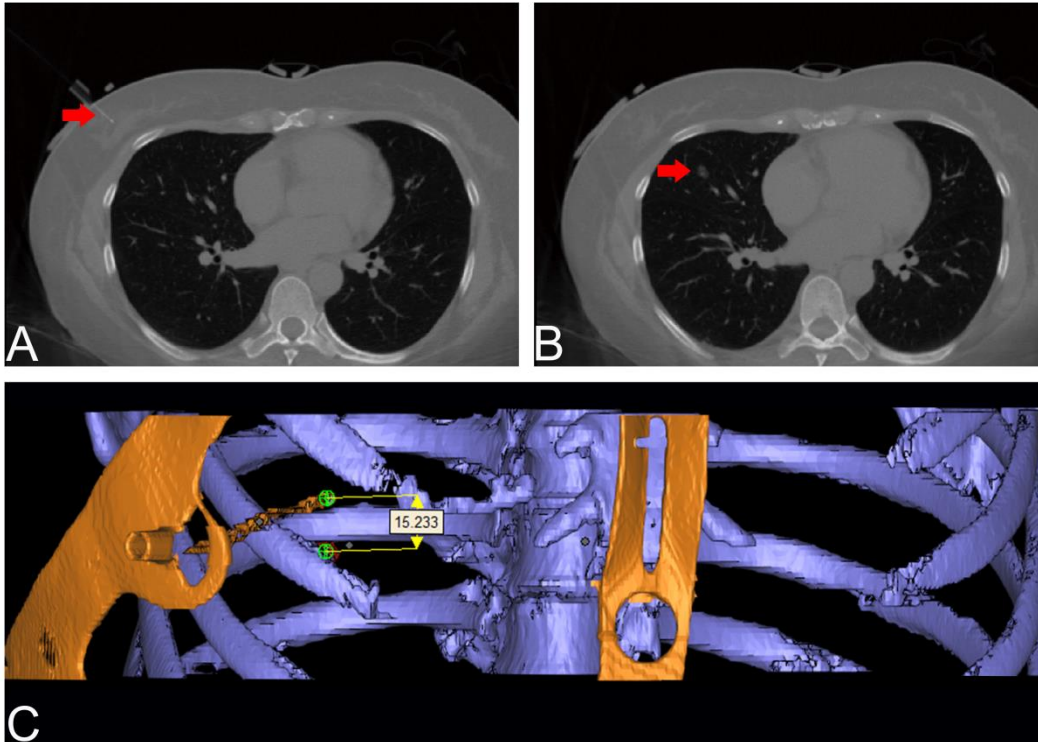

eFigure 3. Measurement of Localizer Deviation in 3-D by Tomographic Reconstruction. A. overview of the relative position between the target nodule and the localizer; B, measurement of coronal deviation; C, measurement of anterior-posterior deviation; D, measurement of vertical deviation.

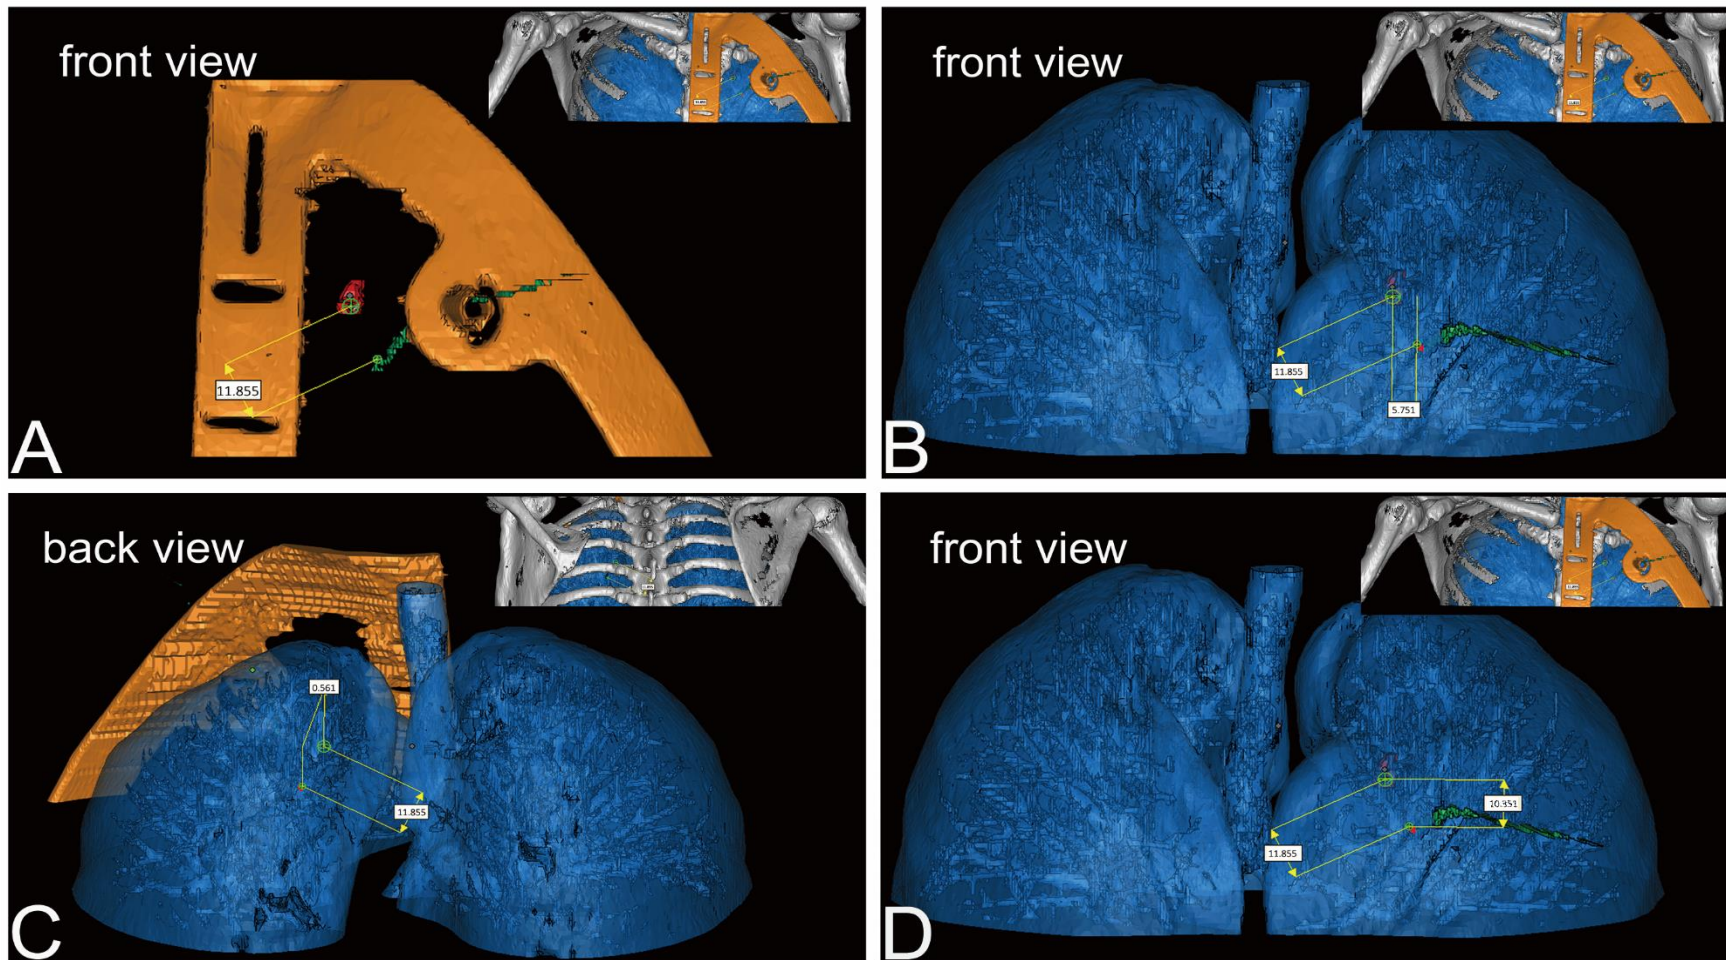

**eFigure 4. Subgroup Analysis of Localizer Deviation by Patients' Positions and Nodules' Locations in Template-Guided Lung Nodule Localization. Nodules were described in the upper or lower field of the lung, which were separated by the carina of the trachea.**

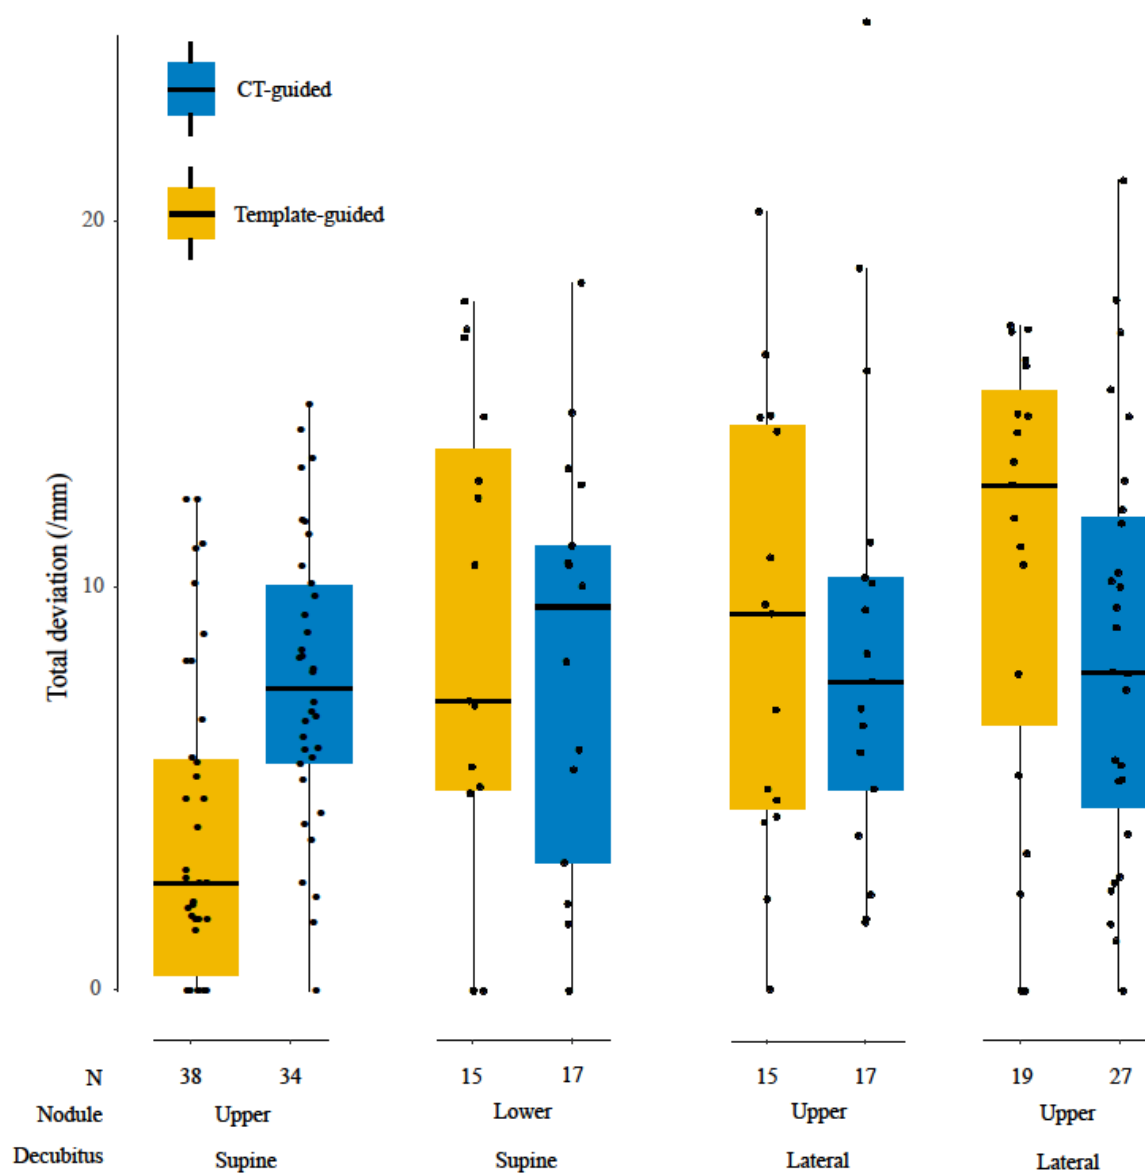

**eTable. Comparison of Frozen Section Analysis and Final Pathology**

| Frozen section analysis | Final pathology |            |            |            |           |
|-------------------------|-----------------|------------|------------|------------|-----------|
|                         | benign (n=13)   | AAH (n=17) | AIS (n=84) | MIA (n=35) | IA (n=41) |
| Benign (n=15)           | 13              | 1          | 1          | 0          | 0         |
| AAH (n=18)              | 0               | 15         | 3          | 0          | 0         |
| AIS (n=82)              | 0               | 1          | 78         | 3          | 0         |
| MIA (n=34)              | 0               | 0          | 2          | 31         | 1         |
| IA (n=41)               | 0               | 0          | 0          | 1          | 40        |

Note: AAH, atypical adenomatous hyperplasia; AIS, adenocarcinoma in situ; MIA, minimally invasive adenocarcinoma IA, invasive adenocarcinoma.
