# Supplementary material
Source: PubMed Central journal article supplement (PMC6484816)
Supplement: jamasurg-154-295-s003.pdf [file jamasurg-154-295-s003.pdf]

## Data Sharing Statement

Zhang. Accuracy of a 3-Dimensionally Printed Navigational Template for Localizing Small Pulmonary Nodules. *JAMA Surg.* Published December 26, 2018. 10.1001/jamasurg.2018.4872

### Data

**Data available:** Yes

**Data types:** Deidentified participant data

**How to access data:** Email address for data request:  
chenthoracic@163.com

**When available:** With publication

### Supporting Documents

**Document types:** None

### Additional Information

**Who can access the data:** anyone requesting the data

**Types of analyses:** for any purpose

**Mechanisms of data availability:** without investigator support
